# Supplementary material for: Blunted Evoked Prouroguanylin Endocrine Secretion in Chronic Constipation
Source: PubMed Central journal article supplement — Clin Transl Gastroenterol. 2019 Jul 17;10(7):e00016. doi: 10.14309/ctg.0000000000000016 (PMC6708669; doi:10.14309/ctg.0000000000000016), 2019-07-17

## Supplementary Materials

**Supplementary Table 1. Baseline Laboratory Examinations**

|                                                                                                                                                                          | Volunteers<br>(n=60) | CIC<br>(n=53)    | IBS-C<br>(N=24)  | P<br>Value          |
|--------------------------------------------------------------------------------------------------------------------------------------------------------------------------|----------------------|------------------|------------------|---------------------|
| <b>Hematology</b>                                                                                                                                                        |                      |                  |                  |                     |
| <b>WBC (<math>10^8/\mu\text{l}</math>)</b>                                                                                                                               |                      |                  |                  |                     |
| Mean (SD)                                                                                                                                                                | 6.2 (1.7)            | 5.8 (2.0)        | 6.4 (1.5)        | 0.23 <sup>a</sup>   |
| Median                                                                                                                                                                   | 5.8                  | 5.7              | 6.3              |                     |
| Q1, Q3 (Range)                                                                                                                                                           | 5.1, 6.8 (7.6)       | 4.3, 6.5 (9.0)   | 5.3, 7.3 (7.3)   |                     |
| <b>Hemoglobin (g/dl)</b>                                                                                                                                                 |                      |                  |                  |                     |
| Mean (SD)                                                                                                                                                                | 14.0 (1.3)           | 13.3 (1.5)       | 13.9 (1.8)       | 0.03 <sup>a,b</sup> |
| Median                                                                                                                                                                   | 13.9                 | 13.2             | 14.0             |                     |
| Q1, Q3 (Range)                                                                                                                                                           | 13.1, 15.0 (6.3)     | 12.4, 14.3 (7.0) | 12.4, 15.4 (7.0) |                     |
| <b>Platelets (<math>10^3/\mu\text{l}</math>)</b>                                                                                                                         |                      |                  |                  |                     |
| Mean (SD)                                                                                                                                                                | 242.3 (47.3)         | 270.3 (54.9)     | 261.6 (49.9)     | 0.01 <sup>a,b</sup> |
| Median                                                                                                                                                                   | 243.5                | 261.0            | 257.5            |                     |
| Q1, Q3 (Range)                                                                                                                                                           | 211, 270 (214)       | 239, 302 (264)   | 242, 284, (258)  |                     |
| <b>Chemistry</b>                                                                                                                                                         |                      |                  |                  |                     |
| <b>Sodium (mmol/L)</b>                                                                                                                                                   |                      |                  |                  |                     |
| Mean (SD)                                                                                                                                                                | 140.1 (2.1)          | 140.2 (2.2)      | 139.7 (1.9)      | 0.50 <sup>a</sup>   |
| Median                                                                                                                                                                   | 140                  | 140              | 140              |                     |
| Q1, Q3 (Range)                                                                                                                                                           | 138, 141 (9)         | 139, 141 (11)    | 139, 141 (10)    |                     |
| <b>Potassium (mEq/L)</b>                                                                                                                                                 |                      |                  |                  |                     |
| Mean (SD)                                                                                                                                                                | 4.4 (0.4)            | 4.5 (0.4)        | 4.5 (0.4)        | 0.38 <sup>a</sup>   |
| Median                                                                                                                                                                   | 4.4                  | 4.5              | 4.4              |                     |
| Q1, Q3 (Range)                                                                                                                                                           | 4.1, 4.6 (1.9)       | 4.3, 4.8 (2.0)   | 4.2, 4.8 (1.6)   |                     |
| <b>Chloride (mmol/L)</b>                                                                                                                                                 |                      |                  |                  |                     |
| Mean (SD)                                                                                                                                                                | 101.5 (2.0)          | 102.0 (1.8)      | 101.4 (1.8)      | 0.16 <sup>a</sup>   |
| Median                                                                                                                                                                   | 102                  | 102              | 101              |                     |
| Q1, Q3 (Range)                                                                                                                                                           | 101, 103 (11)        | 101, 103 (8)     | 100, 103 (7)     |                     |
| <b>Glucose (mg/dL)</b>                                                                                                                                                   |                      |                  |                  |                     |
| Mean (SD)                                                                                                                                                                | 89.5 (9.1)           | 95.2 (27.1)      | 92.1 (10.1)      | 0.22 <sup>a</sup>   |
| Median                                                                                                                                                                   | 89.0                 | 93.0             | 91.5             |                     |
| Q1, Q3 (Range)                                                                                                                                                           | 85.5, 94.0 (66)      | 86.0, 96.0 (210) | 86.0, 96.0 (65)  |                     |
| <sup>1</sup> ANOVA for comparison of group means; <sup>2</sup> Tukey multiple comparison test indicates group differences for volunteers vs. CIC; Fisher Exact, Wilcoxon |                      |                  |                  |                     |

**Supplementary Table 1. Baseline Laboratory Examinations (continued)**

|                                                                                                                                                                                                                                                                   | Volunteers<br>(n=60) | CIC<br>(n=53)   | IBS-C<br>(N=24) | P<br>value             |
|-------------------------------------------------------------------------------------------------------------------------------------------------------------------------------------------------------------------------------------------------------------------|----------------------|-----------------|-----------------|------------------------|
| <b>Chemistry</b>                                                                                                                                                                                                                                                  |                      |                 |                 |                        |
| <b>BUN (mg/dL)</b>                                                                                                                                                                                                                                                |                      |                 |                 |                        |
| Mean (SD)                                                                                                                                                                                                                                                         | 13.5 (3.9)           | 12.1 (4.3)      | 13.1 (3.6)      | 0.17 <sup>a</sup>      |
| Median                                                                                                                                                                                                                                                            | 13.0                 | 11.0            | 12.5            |                        |
| Q1, Q3 (Range)                                                                                                                                                                                                                                                    | 10.5, 16.0 (19)      | 10.0, 15.0 (26) | 10.0, 16.0 (14) |                        |
| <b>Creatinine (mg/dL)</b>                                                                                                                                                                                                                                         |                      |                 |                 |                        |
| Mean (SD)                                                                                                                                                                                                                                                         | 0.9 (0.17)           | 0.8 (0.22)      | 0.8 (0.19)      | 0.0003 <sup>a,c</sup>  |
| Median                                                                                                                                                                                                                                                            | 0.9                  | 0.8             | 0.8             |                        |
| Q1, Q3 (Range)                                                                                                                                                                                                                                                    | 0.8, 1.1 (0.9)       | 0.6, 0.9 (1.1)  | 0.7, 0.9 (0.8)  |                        |
| <b>Calcium (mg/dL)</b>                                                                                                                                                                                                                                            |                      |                 |                 |                        |
| Mean (SD)                                                                                                                                                                                                                                                         | 10.1 (0.4)           | 9.6 (0.4)       | 9.5 (0.3)       | <0.0001 <sup>a,c</sup> |
| Median                                                                                                                                                                                                                                                            | 10.1                 | 9.6             | 9.5             |                        |
| Q1, Q3 (Range)                                                                                                                                                                                                                                                    | 9.9, 10.4 (1.8)      | 9.4, 9.8 (2.3)  | 9.3, 9.8 (1.5)  |                        |
| <b>Phosphorus (mg/dL)</b>                                                                                                                                                                                                                                         |                      |                 |                 |                        |
| Mean (SD)                                                                                                                                                                                                                                                         | 3.5 (0.4)            | 3.6 (0.5)       | 3.5 (0.4)       | 0.20 <sup>a</sup>      |
| Median                                                                                                                                                                                                                                                            | 3.6                  | 3.7             | 3.5             |                        |
| Q1, Q3 (Range)                                                                                                                                                                                                                                                    | 3.3, 3.8, (2.0)      | 3.4, 4.0 (2.4)  | 3.2, 3.8 (1.8)  |                        |
| <b>Protein (g/dL)</b>                                                                                                                                                                                                                                             |                      |                 |                 |                        |
| Mean (SD)                                                                                                                                                                                                                                                         | 7.4 (0.4)            | 7.3 (0.4)       | 7.5 (0.4)       | 0.09 <sup>a</sup>      |
| Median                                                                                                                                                                                                                                                            | 7.5                  | 7.3             | 7.5             |                        |
| Q1, Q3 (Range)                                                                                                                                                                                                                                                    | 7.2, 7.7 (2.2)       | 7.0, 7.5 (2.6)  | 7.2, 7.8 (1.7)  |                        |
| <b>Albumin (g/dL)</b>                                                                                                                                                                                                                                             |                      |                 |                 |                        |
| Mean (SD)                                                                                                                                                                                                                                                         | 4.5 (0.2)            | 4.5 (0.3)       | 4.6 (0.3)       | 0.49 <sup>a</sup>      |
| Median                                                                                                                                                                                                                                                            | 4.6                  | 4.5             | 4.6             |                        |
| Q1, Q3 (Range)                                                                                                                                                                                                                                                    | 4.4, 4.7, (1.0)      | 4.4, 4.7 (2.0)  | 4.4, 4.8 (1.0)  |                        |
| <b>SGOT (U/L)</b>                                                                                                                                                                                                                                                 |                      |                 |                 |                        |
| Mean (SD)                                                                                                                                                                                                                                                         | 23.0(7.0)            | 20.0(10.3)      | 20.0 (7.4)      | 0.095 <sup>a</sup>     |
| Median                                                                                                                                                                                                                                                            | 21.5                 | 17.0            | 18.0            |                        |
| Q1, Q3 (Range)                                                                                                                                                                                                                                                    | 18, 26 (35)          | 15, 22 (66)     | 15, 24 (38)     |                        |
| <sup>a</sup> ANOVA for comparison of group means; <sup>b</sup> Tukey multiple comparison test indicates group differences for volunteers vs. CIC; <sup>c</sup> Tukey multiple comparison test indicates group differences for volunteers vs. either CIC or IBS-C; |                      |                 |                 |                        |

**Supplementary Table 1. Baseline Laboratory Examinations (continued)**

|                                                                                                                                                                                                                                                                   | Volunteers<br>(n=60) | CIC<br>(n=53)  | IBS-C<br>(N=24) | P<br>value             |
|-------------------------------------------------------------------------------------------------------------------------------------------------------------------------------------------------------------------------------------------------------------------|----------------------|----------------|-----------------|------------------------|
| <b>Chemistry</b>                                                                                                                                                                                                                                                  |                      |                |                 |                        |
| <b>SGPT (U/L)</b>                                                                                                                                                                                                                                                 |                      |                |                 |                        |
| Mean (SD)                                                                                                                                                                                                                                                         | 24.3 (13.2)          | 18.1 (10.6)    | 21.2 (16.0)     | 0.056 <sup>a,b</sup>   |
| Median                                                                                                                                                                                                                                                            | 19                   | 16             | 16              |                        |
| Q1, Q3 (Range)                                                                                                                                                                                                                                                    | 15, 31 (71)          | 12, 21 (55)    | 13, 24 (83)     |                        |
| <b>Total Bilirubin (mg/dL)</b>                                                                                                                                                                                                                                    |                      |                |                 |                        |
| Mean (SD)                                                                                                                                                                                                                                                         | 0.52 (0.28)          | 0.49 (0.25)    | 0.55 (0.37)     | 0.67 <sup>a</sup>      |
| Median                                                                                                                                                                                                                                                            | 0.40                 | 0.50           | 0.50            |                        |
| Q1, Q3 (Range)                                                                                                                                                                                                                                                    | 0.3, 0.7 (1.3)       | 0.3, 0.6 (1.2) | 0.3, 0.6 (2.3)  |                        |
| <b>Alk. Phosphatase (U/L)</b>                                                                                                                                                                                                                                     |                      |                |                 |                        |
| Mean (SD)                                                                                                                                                                                                                                                         | 69.2 (22.8)          | 68.6 (18.9)    | 72.6 (19.9)     | 0.56 <sup>a</sup>      |
| Median                                                                                                                                                                                                                                                            | 65                   | 68             | 70              |                        |
| Q1, Q3 (Range)                                                                                                                                                                                                                                                    | 53, 80 (105)         | 55, 78 (89)    | 60, 83 (92)     |                        |
| <b>Urate (mg/dL)</b>                                                                                                                                                                                                                                              |                      |                |                 |                        |
| Mean (SD)                                                                                                                                                                                                                                                         | 5.4 (1.5)            | 4.9 (1.7)      | 5.4 (1.4)       | 0.12 <sup>a</sup>      |
| Median                                                                                                                                                                                                                                                            | 5.4                  | 4.7            | 5.7             |                        |
| Q1, Q3 (Range)                                                                                                                                                                                                                                                    | 4.4, 6.4 (7.0)       | 3.8, 6.0 (8.1) | 4.5, 6.5 (6.2)  |                        |
| <b>Cholesterol (U/L)</b>                                                                                                                                                                                                                                          |                      |                |                 |                        |
| Mean (SD)                                                                                                                                                                                                                                                         | 185.9 (37.1)         | 186.2 (33.6)   | 178.9 (27.1)    | 0.43 <sup>a,c</sup>    |
| Median                                                                                                                                                                                                                                                            | 180.5                | 186.0          | 172.0           |                        |
| Q1, Q3 (Range)                                                                                                                                                                                                                                                    | 161, 208 (201)       | 157, 215 (139) | 156, 204 (103)  |                        |
| <b>Magnesium (mg/dL)</b>                                                                                                                                                                                                                                          |                      |                |                 |                        |
| Mean (SD)                                                                                                                                                                                                                                                         | 1.7 (0.1)            | 2.1 (0.2)      | 2.1 (0.2)       | <0.0001 <sup>a,c</sup> |
| Median                                                                                                                                                                                                                                                            | 1.7                  | 2.1            | 2.1             |                        |
| Q1, Q3 (Range)                                                                                                                                                                                                                                                    | 1.6, 1.8 (0.4)       | 2.0, 2.2 (0.6) | 1.9, 2.2 (0.9)  |                        |
| <sup>a</sup> ANOVA for comparison of group means; <sup>b</sup> Tukey multiple comparison test indicates group differences for volunteers vs. CIC; <sup>c</sup> Tukey multiple comparison test indicates group differences for volunteers vs. either CIC or IBS-C; |                      |                |                 |                        |

## **Supplementary Figure Legends**

**Supplementary Figure 1.** Time course of post-prandial changes in serum ProUGN concentrations in individual participants.

**Supplementary Figure 2.** Time course of post-prandial changes in serum UGN concentrations in individual participants.

Supplementary Figure 1

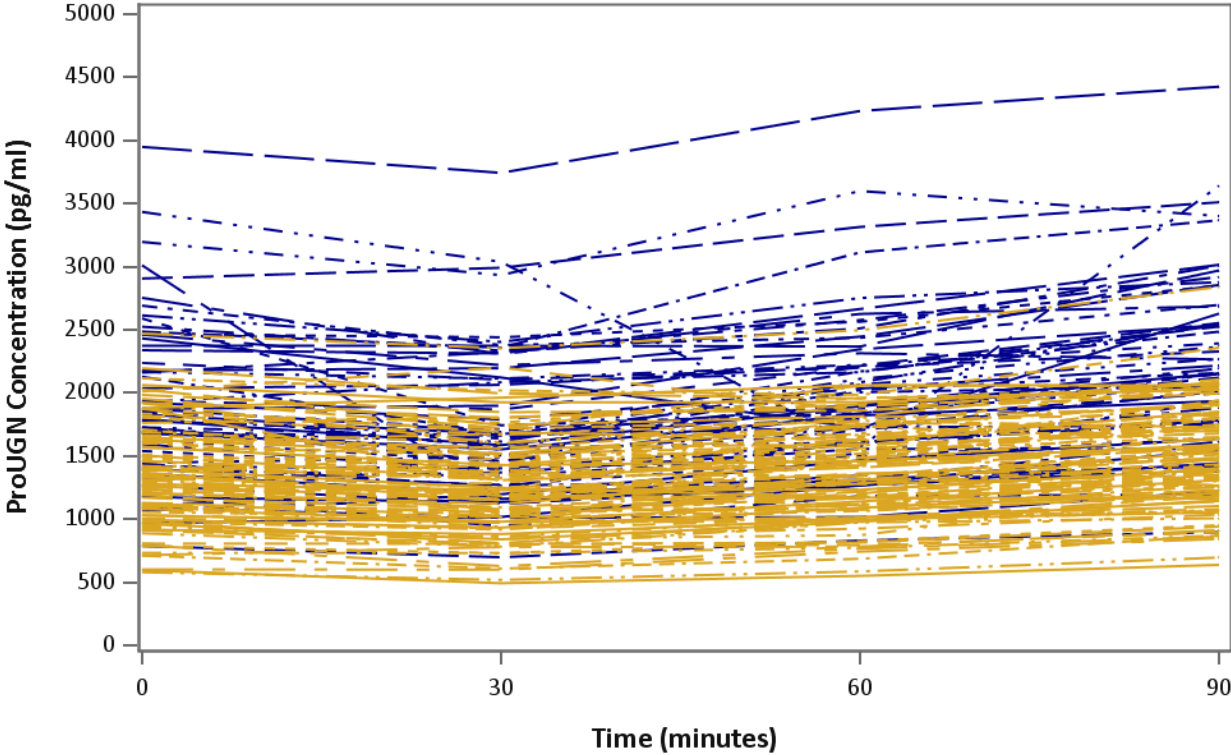

Supplementary Figure 2

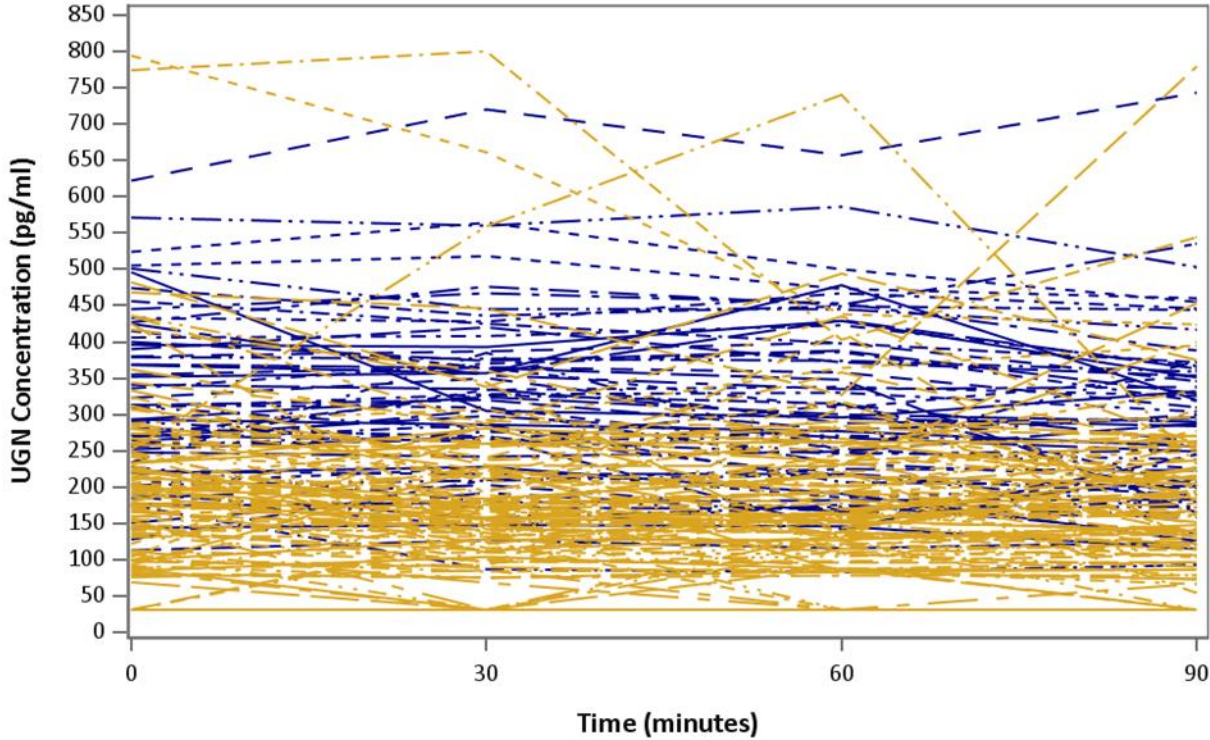

Supplement: ct9-10-e00016-s001.pdf [file ct9-10-e00016-s001.pdf]
